## 1 Patient-specific hemodynamics of new coronary artery bypass configurations

2  
3 Mohammad Rezaeimoghaddam<sup>1</sup>, Gokce Nur Oguz<sup>1</sup>, Sanser Ates<sup>2</sup>, Tijen Alkan Bozkaya<sup>2</sup>, Senol Piskin<sup>3</sup>,  
4 S.Samaneh Lashkarinia<sup>1</sup>, Erhan Tenekecioglu<sup>4</sup>, Haldun Karagoz<sup>5</sup>, Kerem Pekkan<sup>1</sup>

5  
6  
7 <sup>1</sup>Department of Mechanical Engineering, Koç University, Sarıyer, Istanbul, Turkey

8 <sup>2</sup>Department of Cardiovascular Surgery, Koç University Hospital, Topkapı, Istanbul, Turkey

9 <sup>3</sup>Departments of Biomedical & Mechanical Engineering, UTSA, TX, USA

10 <sup>4</sup>Department of Cardiology, Bursa Yuksek Ihtisas Hospital, Yıldırım, Bursa, Turkey

11 <sup>5</sup>Department of Cardiovascular Surgery, VKV. American Hospital, Istanbul, Turkey

12  
13  
14 *Running Title: Hemodynamics of coronary artery by-pass configurations*

15  
16 Address for Correspondence:

17  
18 Kerem Pekkan, PhD.

19 Professor

20 Mechanical Engineering Department Koç University

21 Rumeli Feneri Campus, Sarıyer, Istanbul, Turkey

22 Phone: +90 (533) 356 3595

23 Fax: +90 (212) 338 1548

24 E-mail: [kpekk@ku.edu.tr](mailto:kpekk@ku.edu.tr)

## 28 **Abstract**

### 29 ***Purpose***

30 This study aims to quantify the patient-specific hemodynamics of complex conduit routing configurations of coronary  
31 artery bypass grafting (CABG) operation which are specifically suitable for off-pump surgeries. Coronary perfusion  
32 efficacy and local hemodynamics of multiple left internal mammary artery (LIMA) with sequential and end-to-side  
33 anastomosis are investigated. Using a full anatomical model comprised of aortic arch and coronary artery branches  
34 the optimum perfusion configuration in multi-vessel coronary artery stenosis is desired.

### 35 ***Methodology***

36 Two clinically relevant CABG configurations are created using a virtual surgical planning tool where for each  
37 configuration set, the stenosis level, anastomosis distance and angle were varied. A non-Newtonian computational  
38 fluid dynamics solver in OpenFOAM incorporated with resistance boundary conditions representing the coronary  
39 perfusion physiology was developed. The numerical accuracy is verified and results agreed well with a validated  
40 commercial cardiovascular flow solver and experiments. For segmental performance analysis, new coronary perfusion  
41 indices to quantify deviation from the healthy scenario were introduced.

### 42 ***Results***

43 The first simulation configuration set; - a CABG targeting two stenosis sites on the left anterior descending artery  
44 (LAD), the LIMA graft was capable of 31 mL/min blood supply for all the parametric cases and uphold the healthy  
45 LAD perfusion in agreement with the clinical experience. In the second end-to-side anastomosed graft configuration  
46 set; -the radial artery graft anastomosed to LIMA, a maximum of 64 ml/min flow rate in LIMA was observed.  
47 However, except LAD, the obtuse marginal (OM) and second marginal artery (m2) suffered poor perfusion. In the  
48 first set, average wall shear stress (WSS) were in the range of 4 to 35 dyns/cm<sup>2</sup> for in LAD. Nevertheless, for second  
49 configuration sets the WSS values were higher as the LIMA could not supply enough blood to OM and m2.

### 50 ***Conclusion***

51 The virtual surgical configurations have the potential to improve the quality of operation by providing quantitative  
52 surgical insight. The degree of stenosis is a critical factor in terms of coronary perfusion and WSS. The sequential  
53 anastomosis can be done safely if the anastomosis angle is less than 90 degrees regardless of degree of stenosis. The  
54 smaller proposed perfusion index value,  $O(0.04-0) \times 10^2$ , enable us to quantify the post-op hemodynamic performance  
55 by comparing with the ideal healthy physiological flow.

56

57

## 58 **Introduction**

59 Coronary artery disease (CAD) is the principal cause of morbidity and mortality in the world [1]. Despite  
60 the decline in global mortality rate over the last decade, CAD pose an increasing trend in the developing  
61 countries [2]. In addition to preventive measures [3], this trend signifies the need to invent and analyze new  
62 patient-specific surgical strategies targeting CAD. Coronary artery bypass grafting (CABG) is generally  
63 performed when one or more coronary arteries are fully or partially blocked due to atherosclerosis. CABG  
64 provides an alternative blood flow route surpassing the occluded arteries, typically by using native venous  
65 or arterial grafts. In addition, CABG provides a better survival rate in severe patients with multivessel  
66 disease and diabetes, significantly helping to prevent myocardial infarction and reduce repeat  
67 revascularization [4-7]. Patients undergoing CABG operation, are at the risk of restenosis due to  
68 atherosclerotic plaque formation which may also lead to thrombosis. Venous grafts are associated with a  
69 low patency rate of 60% in 5 years, whereas the preferential choice [8] arterial grafts sustain significantly  
70 longer [9]. The selection of the graft type is important since the success of CABG depends on long-term  
71 graft patency which is linked to the local hemodynamic environment. Numerous factors are implicated as  
72 the cause of intimal hyperplasia and atherosclerosis, including endothelial injury, platelet activation,  
73 disturbed flow patterns, biomaterial incompatibility, extreme level of wall shear stress (WSS), extreme  
74 pressure levels and compliance mismatch between the graft and the target vessel [10]. Spatial and temporal  
75 gradients of WSS and oscillatory shear index are the important hemodynamic factors in the by-pass graft  
76 design. As such, the numerical studies on blood flow in human aortic arch indicate preferential development  
77 of early atherosclerosis formation in regions of extreme (maxima or minima) WSS and pressure [11].  
78 Consequently, the geometry of bypass graft configurations has a direct impact on the long-term patency of  
79 the coronary arteries by reducing the risk of restenosis and improving the myocardial perfusion both at  
80 early- and long-term follow-up.

81 As investigated in here, the stenosis sites of the left anterior descending artery ( LAD ) is particularly  
82 critical for surgical planning as almost half of the left ventricle flow is supplied through this branch [12].

83 The highest patency rates can be achieved with a left internal mammary artery (LIMA) grafts to LAD  
84 anastomosis, which is considered to be the gold standard for surgical revascularization [13]. Current clinical  
85 practice is founded on two types CABG surgical templates; the single- and the sequential bypass  
86 anastomosis grafting. To our knowledge, the hemodynamic differences of these techniques are not  
87 compared objectively in the literature for the same patient. In the single grafting technique, one distal end-  
88 to-side anastomosis is constructed for each branch stenosis. In contrast, the sequential bypass technique,  
89 first described by Flemma et al [14], employs a single by-pass graft and a sequence of side-to-side  
90 anastomosis for each stenosis. Intraoperative studies showed that the sequential grafting provides higher  
91 blood flow in the proximal section compared to a single graft [15-17] and generally results better patency  
92 rates than single grafting [15]. The sequential grafting can be created either by using only LIMA, or by  
93 anastomosing LIMA with the radial artery (RA). Given the myriad of alternatives and availability of several  
94 performance optimization parameters achieving the desired perfusion is a complex task which is primarily  
95 based on the surgeon's intuition. While the pressure and velocity waveforms can be acquired crudely  
96 through invasive coronary catheterization, the local hemodynamic information like wall shear stress (WSS),  
97 can only be estimated through computational fluid dynamics modeling [18, 19]. Hence, the computational  
98 simulations of complex CABG cases gives an insight to surgeons to examine the hemodynamics factors  
99 and obtain the best/optimum scenario as highlighted in our previous work [17].

100 Hemodynamic optimization of CABG through virtual surgical simulation has been proven to be  
101 effective by many research teams, for example Refs. [17, 20]. A valid computational hemodynamic CABG  
102 model require correct coronary artery physiology, easily accessible non-Newtonian open source solver and  
103 a patient-specific anatomy that incorporate both the aorta and the coronary artery tree in detail.  
104 Unfortunately, to our knowledge, neither of the existing studies satisfy all these modeling requirements at  
105 the same time. In an idealized CABG anatomy, Sankaranarayanan et al. [21] used constant pressure  
106 boundary conditions (BC) which is limited to represent the correct physiological perfusion response.  
107 Furthermore, post-Op pressure levels are unknown in a real surgical planning scenario. Sankaran et al. [19]  
108 investigated the effect of anastomosis angle on pre- and post-surgical flow conditions using an open source

109 multiscale lumped parameter boundary condition (BC), but did not consider multiple stenosis sites.  
110 Likewise Ballarin et al. [22] used the reduced order finite element method in several patient-specific  
111 CABGs, including Y-grafts with LIMA and sequential to RA or saphenous vein grafts and sequential grafts,  
112 while the integrated aorta and coronary branches are ignored to achieve fast simulation results. The CABG  
113 simulation by Keslerova et al. [23] is probably the only published OpenFOAM model where an idealized  
114 narrowed host tube and the bypass graft with a 45-degree anastomosis angle is investigated. Finally, while  
115 the effects of anastomosis angle, shape and the thickness of the graft on the hemodynamic performance of  
116 the surgery have been studied in local models [18-21], to date, the effect of angulation between RA on  
117 LIMA and the effect of the distance between sequential grafting on a single coronary artery have not been  
118 studied and attempted in the present manuscript. The ideal angulation and ideal distance should ensure the  
119 lowest flow vorticity, optimum WSS and flow distribution, thereby minimizing the risk of endothelial  
120 damage and prolonging the graft patency. Experimentally, it has been shown that the anastomosis angle  
121 between the graft and native vessel has an effect on the flow patterns that affects the graft patency in the  
122 long term [24]. Thus, we hypothesized that the anastomosis angle between two grafts such as LIMA and  
123 RA may influence the local flow patterns.

124         In our previous patient-specific CABG modelling study [17] we examined three different CABG  
125 scenarios, right coronary artery (RCA), LAD and left circumflex artery (LCX) bypasses using a multivariate  
126 optimization applied on the LIMA graft. The optimization objective function was set to minimize the local  
127 variation of WSS and other hemodynamic indices i.e. energy dissipation, flow deviation angle, average  
128 WSS, and vorticity, that correlate with performance of the graft and risk of re-stenosis at the anastomosis  
129 zone. In the current study, a new composite grafting technique was used to expand the previously optimized  
130 LIMA graft to a larger cardiac territory by using short saphenous vein graft or RA as a venous bridge where  
131 is sequentially anastomosed to LAD and other targets [25]. Most importantly the present configurations  
132 correspond to a full-arterial revascularization architecture via composite grafting technique which surgeons  
133 are using at off-pump CABG with facile stabilization technique [26] is reconstructed.

134 The main objectives of this paper are; (i) to present a non-invasive and open source computational  
135 design framework that could be used in off-pump CABG surgical planning, (ii) to examine the dependency  
136 of local hemodynamics with multiple stenosis lesions, that also includes an end to end CABG graft with a  
137 T shape sequential RA graft on the OM and m2, (iii) to find out the maximum possible flow rate that can  
138 be ideally supplied by LIMA to feed LAD, OM and m2 deducted blood flow rate due to different coronary  
139 arteries occlusion sites, and finally, (iv) to demonstrate new clinical hemodynamic perfusion indices to  
140 assess post-Op flow performance compared to the healthy *baseline* case.

141 The paper is organized as follows; in the Methodology section, the details of patient-specific CFD  
142 simulations of aortic arch and all coronary arteries branches are provided. Then implementation of  
143 resistance boundary conditions and non-Newtonian model as well as the calculation of hemodynamic  
144 perfusion indices are presented together with model verification and validation. Results and Discussion  
145 sections focus on the interpretations of local hemodynamics such as pressure, WSS and velocity fields for  
146 different surgical geometries using novel hemodynamic indices. In the Limitations section we summarized  
147 the limitations of current approach in representing the physiological CABG hemodynamics.

148

## 149 **Methodology**

### 150 **Patient-specific geometry and validations**

151 The three-dimensional (3D) computer aided design model for a 54-year-old anonymized patient was  
152 obtained from post-op computed tomography (CT) images and reconstructed using Simpleware-Scan IP  
153 (Simpleware Ltd., Innovation Centre, Exeter, UK) through approved IRB. The details of model generation  
154 was described in our previous study [17]. Briefly, we used the aforementioned anatomy template of aorta-  
155 coronary integrated model as a baseline model to generate new by-pass graft configurations. Figure 1 shows  
156 the 3D reconstructed model, grafts with different colors, stenosis sites and circuit schematics of integrated  
157 resistance boundary conditions and model branch extensions.

158

159 <Insert Figure 1>

160

161 As described in [17], The LIMA graft shape was optimized with cost functions, i.e. average WSS,  
162 energy dissipation and pressure drop, to have the optimal local hemodynamics. Using this model, the new  
163 end-to-side anastomosis graft configurations was created under the supervision the surgeons. For multiple  
164 stenosis sites located at one or different coronary branches, two sets of by-pass configuration were  
165 considered. Figure 2 shows the template for each configuration type.

166

167 <insert Figure 2>

168

169 The first configuration set covers the sequential grafting of LIMA graft to LAD with two side-to-  
170 side anastomosis sites. The second set represents a “T-topology” end-to-side LIMA anastomosis to RA and  
171 carries blood to OM and m2 branches having a total of three anastomosis sites (Figure 2).

172 In the first configuration set, LIMA is anastomosed to LAD with a sequential graft. The stenosis  
173 site distance varies between 2 cm and 4 cm, and has two different degrees of stenosis, 75% and 95%. The  
174 total number of eight cases were created and labeled with generic case names, e.g. case\_2\_75\_95 represents  
175 the configuration that has a 2 cm bypass distance between the two stenosis on LAD with *Stenosis 1* having  
176 75% obstruction and *Stenosis 2* having 95% obstruction. For future illustration, the close-up view of  
177 sequential grafting for case\_2\_75\_75 is provided in Figure 2a. In Figure 2b the second configuration set  
178 which includes the sequential grafting of LIMA and RA for a case\_30\_75 is shown.

179 The second set of by-pass configurations were established to assess the effect of RA angulation on  
180 LIMA and the degree of stenosis. The sequential grafts with two different RA angulation, 30° and 90° were  
181 generated for two different degrees of stenosis, 75% and 95%. Where 30° is in acceptable inclination range  
182 and 90° can be considered as a cut-off angle. A total number of four cases were created and labeled as  
183 generic case names, e.g. case\_30\_75 stands for 30° RA angulation scenarios with 75% as degree of the  
184 stenosis. In addition, for comparison with sequential cases two cases with single\_G\_75 and single\_G\_95

185 which stand for 75% and 95% stenosis level were created. The degree of stenosis is defined based on the  
186 vessel crosssectional area.

187 Normally, the diameter of RA grafts varies between 2 to 3 mm while LIMA grafts have a diameter  
188 of 1.9 to 2.6 mm [27, 28]. In the current study, all of the grafts have a uniform diameter of ~2 mm to ensure  
189 proper vascularization and consistency in comparison between different configurations. The computational  
190 domain of aorta-coronary arteries integrated model involves one inlet and multiple outlets. To eliminate  
191 spurious reflections, all outlets were extended 10 diameters of cross section in length to ensure uniform  
192 outlet pressure distribution and fully-developed inlet velocity profile. High-quality tetrahedral grids with  
193 ~2 million (M) elements were set up using POINTWISE V16.04 (Pointwise, Inc.) for all configurations  
194 (with graft and stenosis).

### 195 **CFD solver and boundary conditions**

196 All simulations were conducted using OpenFOAM v1806 [29]. The simulations were performed using 3D  
197 transient, laminar, incompressible with second-order accuracy in both pressure and velocity. A constant,  
198 plug velocity profile with 0.091 m/s was specified to represent the time-averaged flow rate at the inlet  
199 boundary and resistance boundary conditions were applied at all outlets coupled to a lumped parameter  
200 model to guarantee realistic flow distribution along the coronary artery tree (Equation 1).

$$196 \quad p = Q \times R + p_{ref} - \frac{\rho}{2} \times \left(\frac{Q}{A}\right)^2 \quad (1)$$

201 where  $p$  is the pressure (Pa),  $Q$  is the volumetric flow rate ( $\text{m}^3/\text{s}$ ),  $R$  is the resistance ( $\text{Pa} \cdot \text{s} / \text{m}^3$ ) of the  
202 corresponding outlet,  $p_{ref}$  is the atrium/ventricle pressure,  $A$  is the area of the outlet ( $\text{m}^2$ ), and  $\rho$  is the  
203 blood density which is considered as  $1060 \text{ kg}/\text{m}^3$ . Clinical resistance values were incorporated as in our  
204 previous analyses [17, 30, 31].

205 To render the exact behavior of blood jet regime that is encountered in severe stenosis level and  
206 capture primary and secondary flow patterns, as well as WSS distributions [32] a non-Newtonian model  
207 was used and implemented in a modified non-Newtonian IcoFoam of OpenFOAM. Equation (2) shows the  
208 generalized power-law model which is used in the simulations particularly for the low shear regions [33].



$$\mu = \lambda |\dot{\gamma}|^{n-1}, \quad (2)$$

209 and the values of  $\lambda$  and  $n$  are calculated as

$$\lambda(\dot{\gamma}) = \mu_{\infty} + \Delta\mu e^{\left[-\left(1+\frac{|\dot{\gamma}|}{a}\right)e^{\left(\frac{-b}{|\dot{\gamma}|}\right)}\right]}, \quad (3a)$$

$$n(\dot{\gamma}) = n_{\infty} - \Delta n e^{\left[-\left(1+\frac{|\dot{\gamma}|}{c}\right)e^{\left(\frac{-d}{|\dot{\gamma}|}\right)}\right]}, \quad (3b)$$

210 where  $\mu$  is the dynamic viscosity (poise). The rest of the scalar coefficients are set as follows;  $\mu_{\infty} = 0.035$ ,  
211  $n_{\infty} = 1.0$ ,  $\Delta\mu = 0.25$ ,  $\Delta n = 0.45$ ,  $a = 50$ ,  $b = 3$ ,  $c = 50$  and  $d = 4$ . The time-step size is set to 0.1  
212 milliseconds and the simulations were performed until convergence reached to residuals of  $10^{-4}$ . The last  
213 100-time-step data were averaged to reduce the effect of oscillation in the residuals.

214 The mesh independence study was performed for healthy configuration by generating a gradually  
215 increasing number of grids 1 million(M), 1.4M, 1.8M, 2.2M, 2.7M, 3.5M, and 4M unstructured tetrahedral  
216 cells and convergence analysis along the streamline in descending aorta were performed. A brief summary  
217 of the mesh verification study is presented in Figure 3, in which velocity magnitude profiles for these grids  
218 were compared.

219

220 <Insert Figure 3>

221

222 The medium mesh of 2.2 M was selected as the baseline model simulations as it offered  
223 computational efficiency and resulted in less than 5% absolute error in velocity magnitude. Table 1 presents  
224 the calculated flow rates obtained from CFD simulation for the healthy coronary anatomy.

225

226 <Insert Table 1>

227

228 For a final verification we compared OpenFOAM model results with our earlier Ansys Fluent CFD  
229 solutions [17] for the exact same patient-specific coronary artery model of healthy case. The OpenFOAM

230 flow fields were found to be qualitatively identical with Ansys-Fluent computations having a maximum of  
231 8% absolute error. The CFD solver used in this study was experimentally validated through the US Food  
232 and Drug Administration (FDA) Nozzle benchmark for *in vitro* experiment [34] (These results not shown  
233 for brevity but provided to Reviewers).

234

## 235 **Hemodynamic performance indices for CABG perfusion**

236 In order to have a better insight for the hemodynamic performance, perfusion indices relevant for CABG  
237 planning were introduced to compare the myocardial perfusion by normalizing mean cardiac output and  
238 velocity magnitude variations. These new indices quantify the summation of absolute values differences  
239 for volumetric flow rate with respect to the healthy scenario at the selected vascular segments. Three types  
240 of perfusion indices are calculated to observe improvements in the upper body, lower body, and coronary  
241 perfusion qualities are *Coronary Perfusion Index (COP)*, *Cerebral Perfusion Index (CEP)* and *Lower Body*  
242 *Perfusion Index (LOP)*, respectively, which are defined as follows (Equations 4 to 6).

$$COP = 100 \times \sum_{i=Coronary\ branch} \frac{\sqrt{(Q_{post-surgery,i} - Q_{healthy,i})^2}}{Q_{healthy,total}} \quad (4)$$

$$CEP = 100 \times \sum_{i=aortic\ arch\ outlet} \frac{\sqrt{(Q_{post-surgery,i} - Q_{healthy,i})^2}}{Q_{healthy,total}} \quad (5)$$

$$LOP = 100 \times \frac{\sqrt{(Q_{descending\ aorta} - Q_{healthy})^2}}{Q_{healthy,total}} \quad (6)$$

243

244 Where  $Q(m^3/s)$  is the volumetric flow rate,  $Q_{healthy,i}$  corresponds to the  $i$ -th coronary/arch branch  
245 flowrate in the healthy model (with no stenosis).  $Q_{post-surgery,i}$  is the calculated flow rate for the same  
246 coronary/arch branch model after CABG surgery.  $Q_{descending\ aorta}$  is the flow rate for the descending aorta  
247 outlet in the post-surgery cases and *coronary outlets* include for RCA, LCX, LAD, OM, m2, first septal  
248 artery (s1), diagonal artery (Diag) and ramus marginalis (RM). *Aortic arch outlet* stands for innominate

249 artery (Inn. A), left common carotid artery (LCCA), vertebral artery (VA) and left subclavian artery (LSA).  
250 Ideal healthy values of all indices are indicated with zero, which correspond to the state where the post-  
251 operative myocardial perfusions were equal to the healthy perfusion flow rates (no stenosis). The perfusion  
252 index values indicate the percentage deviation of the post-surgery perfusion from the healthy coronary  
253 artery system.

254

## 255 **Results**

### 256 *Post-surgery flow divisions*

257 Table 2 compares the volumetric flow rates on selected cross sections (as labeled in Figure 2a) for the cases  
258 with sequential grafting of LIMA to LAD with end-to-side and side-to-side anastomosis sites.

259 <Insert Table 2>

260

261 When both stenosis levels are 75%, regardless of the distance between two stenosis sites, the LAD  
262 flow rate is 8.5 mL/min and the LIMA can supply an additional 24 mL/min to sustain the equivalent healthy  
263 case flow rate. However, the blood supply to LAD through the P2 cross-section is higher for case with 4  
264 cm separation distance compared to 2 cm. Similar trends was observed for cases when one or both of the  
265 stenosis sites have 95% occlusion, regardless of the location. For this configuration, the LIMA flow rate is  
266 31 mL/min. Furthermore 4 cm separation distance receive more blood by LIMA. When the upstream  
267 stenosis level increases to 95%, the LAD flow rate is increased 900%, assuring adequate blood supply to  
268 the LAD mid-segment. Computations showed that LIMA can supply LAD adequately even for severe  
269 obstructions, as all cases achieved the healthy flow rate at the LAD outlet. B2 cross-section plane has the  
270 maximum flow rate for case\_2\_95\_95 in which the degree of occlusion is the highest. Moreover, the flow  
271 through the P2 plane is maximum for case\_4\_75\_75 as expected due to the lower stenosis degree. The  
272 minimum flow can be fed by LIMA pass through P2 plane was found for the case\_2\_95\_95. Similarly,  
273 LAD outlet flow remained at the healthy level.

274 The post-operative flow split levels for different RA angulation cases are presented in Table 3.

275

276 <Insert Table 3>

277

278 The LIMA has supplied almost 40 mL/min blood for the cases with 75% degree of stenosis. This  
279 increases to 64 – 67 ml/min for the cases having 95% stenosis in all branches. For case 30\_75 and case  
280 90\_75 end-to-side graft provided equal flow split between OM and m2 where each branch receives around  
281 7-8 mL/min blood flow. The maximum flow rate in LIMA occurs for case\_30\_95. However, except LAD  
282 which receives adequate blood supply through LIMA, OM and m2 perfusion was significantly reduced in  
283 all simulations. As expected, the maximum flow rates in B3 cross-section occurs for case\_30\_95. The effect  
284 of LIMA anastomosis angle, beyond the 90° cut-off/failure angle, becomes more apparent for cases with  
285 higher stenosis levels. In comparison, the flow that LAD steals from LIMA did not altered significantly as  
286 the degree of stenosis is increased and rest of the available blood flow is distributed between LAD and OM,  
287 leaving only a relatively small portion for m2. Both case\_30\_95 and case\_90\_95 configurations lead to an  
288 increase in the B2 flow rate and reach twice as much in cases of 75% stenosis. Moreover, the flow  
289 deficiency in OM is lower compared to m2. As a final note, the m2 flow rate is affected by changing the  
290 degree of stenosis. Furthermore, the diagonal artery flow rate is lower than its healthy flow by 25%.  
291 However, when the stenosis occlusion level is 95%, OM flow rate was 15% lower with respect to the  
292 healthy baseline. The m2 perfusion for all configurations was lower compared to the healthy baseline by a  
293 margin of ~ 20%.

294

### 295 ***Computed perfusion indices***

296 Hemodynamic perfusion indices, *COP*, *CEP* and *LOP* are presented in Table 4 for all configurations.

297

298 <Insert Table 4>

299

300 In order to qualitatively assess the results with single stenosis sites in LAD, two standard CABG  
301 configurations for single stenosis sites on LIMA single\_G\_75 and single\_G\_95 are also presented in Table  
302 4. This table shows that the deviation from healthy flow rates has the maximum value of 4.1% for *COP*  
303 and remains less than 1% for *CEP* and *LOP*. The *COP* index values were in the same very low range except  
304 radial cases, case\_30\_75, case\_90\_75, case\_90\_75 and case\_90\_95. It can be derived that the LIMA flow  
305 rate is subtracted from cerebral and coronary branches rather than descending aorta. For the 8 sequential  
306 grafting of LIMA to LAD with two side-to-side anastomosis *CEP* indices changes between 0.4% to 0.6%  
307 and for 4 sequential grafting of LIMA and RA cases the *CEP* varies between 3.3% to 4.1%. For all cases,  
308 *COP* and *CEP* are similar even though the degree of stenosis is increased. *LOP* indices changes were also  
309 within the same low range of 0-0.1% for all 12 surgical configurations investigated in this study.

310

### 311 ***Pressure distribution***

312 Examining the pressure distribution maps are important for surgical planning, particularly due to the early  
313 post-operative hypertension being a major risk factor [35]. The pressure contours for 8 alternative cases of  
314 sequential grafting of LIMA to LAD with two side-to-side anastomoses and 4 different cases of sequential  
315 grafting of LIMA with end-to-side RA angulation are plotted in Figures 4 and 5 respectively.

316

317 <Insert Figure 4>

318

319 <Insert Figure 5>

320

321 In Figure 4 for all revascularization cases the pressure distribution for LIMA and coronary arteries  
322 are in the same range of 80-83 mmHg. As in our previous work the pressure distribution of the healthy case  
323 is conserved. Despite relatively uniform pressure levels, as the by-pass distance increased, the pressure at  
324 proximal sites of the LAD were slightly higher in cases with 95% occlusion (~0.5 mmHg). While major

325 pressure drop occurs in cases with at least one 95% obstruction, the alterations in the obstruction level in  
326 *Stenosis 2* resulted more influence in the pressure drop. When the obstruction level in *Stenosis 1* increased  
327 from 75% to 95%, individual pressure drop values from LIMA-to-LAD outlet increased around ~0.5 mmHg  
328 which is due to the higher blood velocity in the LIMA.

329 All four revascularization cases, even though the pressure distribution for LIMA was in the same  
330 range of 80-83 mmHg, local pressure drops in coronary arteries specially in OM and m2 and LCX were  
331 significantly altered (Figure 5). For RA angulation configurations, the entire pressure characteristics altered  
332 substantially as the degree of stenosis increased, with LIMA, RA, LAD, OM, and m2 pressures decreasing  
333 to a maximum range of with 95% occlusion level ~1 mmHg. Between case\_30\_75 and case\_90\_75, a slight  
334 decrease of 0.5 mmHg in pressure levels at section B, proximal to the bifurcation of LAD and the diagonal  
335 artery was noted, which was probably due to higher energy loss at the T-junction area (90° angle). The  
336 major pressure drop occurred in cases with 95% obstruction level, as expected, and the changes started in  
337 the angulation of T-shape and anastomosed coronary branches. The relationship for increasing in pressure  
338 loss when the anastomosis angle increases has been identified in the previous studies by examining the  
339 effect of anastomosis angle between LIMA to LAD [5]. The pressure loss could be due to an increase in  
340 the disturbed flow level when the anastomosis angle increases. Increase in pressure distribution was also  
341 observed at RA, LAD, OM and m2 branches for 90° anastomosis (case\_90\_95), compared to 30°  
342 anastomosis (case\_30\_95) having 95% stenosis.

343

#### 344 ***Wall shear stress distribution***

345 Figure 6 illustrates the WSS distributions for different bypass distance scenarios.

346

347 <Insert Figure 6>

348

349 The WSS values varies between 4 and 15 dyns/cm<sup>2</sup> and considered within the normal range (10-25  
350 dyns/cm<sup>2</sup> [36] except for 95% distal stenosis sites. This can be interpreted due to the unidirectional flow in

351 LIMA which smoothly joined in the LAD and in the absence of stagnation point the WSS is kept in an  
352 acceptable range. WSS level at the critical anastomosis regions, including toe, heel and arterial bed are in  
353 satisfactory range (Figure 6). Higher WSS regions are observed at the distal LIMA anastomosis site for all  
354 sequential bypass configurations. This is due to increase of flow rate supplied by LIMA between two  
355 anastomosis sites. In addition, cases with 95% distal stenosis has higher WSS value compared to the cases  
356 with 75% distal stenosis. For RA angulation configurations, the WSS levels and gradients were found to be  
357 within similar ranges (Figure 7).

358 <Insert Figure 7>

359 However, at the LIMA-RA anastomosis site when the 95% degree of stenosis is introduced a  
360 different flow characteristics was observed. In addition, high WSS zones are localized at the LIMA-RA  
361 bifurcation which is due to the change in momentum direction that is higher for 90° due to energy loss. As  
362 the anastomosis angle increased from 30° to 90° for 95% degree of stenosis, case\_30\_95 vs. case\_90\_95,  
363 the transition behavior in LIMA-RA anastomosis changed significantly where the 90° angulation with 95%  
364 stenosis case\_90\_95) demonstrated smoother WSS transition than the 30° angulation (case\_30\_95).

365

366

367

### 368 ***Velocity distribution***

369 In Figure 8, for brevity, the velocity streamlines are colored with velocity magnitude only for the first  
370 configuration set. To see the streamline videos of other configurations please see the Supplementary  
371 Material.

372

373 <Insert Figure 8>

374

375 In both case\_2\_75\_75 and case\_4\_75\_75 the LIMA by-pass flow meets LAD flow stream smoothly  
376 and no recirculation is observed. For the rest of the cases the recirculation zones are observed at LAD. This  
377 phenomenon is due to the high momentum flow which originates from the LIMA, for cases with at least  
378 one stenosis site of 95% occlusion. It is worth mentioning that the end-to-side anastomosis angle was  
379 selected ( $\alpha = 32^\circ$ ) from our previously study as well as the side-to-side anastomosis angle by the surgeons  
380 in the current study. The additional flow coming from LIMA to anastomosis sites directs it smoothly into  
381 LAD and prevents arterial bed impingement and no stagnation point was noted. Despite the cases with one  
382 stenosis of 75% regardless of its site the flow can pass through the LAD is highly affected by higher stenosis  
383 ratio which resulted in higher velocity values between the two stenosis sites relative to the remaining cases.  
384 The effect of downstream resistance on the LIMA flow supply is important. The maximum flow rate in  
385 side-to-side graft is detected case\_4\_95\_95 where the LIMA flow rate contribution is added more blood to  
386 the second stenosis site compared to 2 cm distance.

387

## 388 Discussion

389 Pressure distribution contours confirmed that the coronary arteries have lower pressure values compared to  
390 other vessels, such as the aortic arch, descending aorta and carotid arteries due to relatively low flow  
391 through the coronary artery bed. These results suggest that anastomosis distance had a relatively moderate  
392 effect on pressure, demonstrating only a 1-3% change in the carotid arteries. Likewise, the RA anastomosis  
393 angle has no effect on acute post-op pressure level (2% change in coronary arteries).

394 The sequential anastomosis distance had relatively small effect (~2%) on WSS as well as the radial  
395 artery angle (~2%). The high regions of WSS are observed at the distal LIMA anastomosis site for the first  
396 set. For the second set, the high WSS zones are localized in the stenosis sites having 95% occlusion.  
397 Therefore, the anastomosis region and downstream regions after the stenosis demonstrated low WSS  
398 compared to the rest of the vessel. This unbalance has the potential to be detrimental for long term graft  
399 patency and may result new stenosis regions, especially in the vicinity of the anastomosis sites. Low WSS



400 induces several mechanobiological pathways triggering endothelial dysfunction, platelet aggregation, lipid  
401 diffusion through the subintimal layer within the vessel wall and neointimal hyperplasia. In addition to the  
402 low shear stress there are other factors related to the destruction and occlusion. The effect of graft caliber,  
403 the effect of competitive flow through the bypassed native coronary, the severity of stenosis and distance  
404 of the grafting, the out-of-plane graft curvature, the anastomotic angle and the anastomotic configurations  
405 highly influence the patency and occlusion in the vicinity of the anastomosis [21, 37-42].

406 Furthermore, the degree of stenosis is a crucial factor in determining the performance of coronary  
407 bypass surgeries in terms of coronary perfusion and WSS. Anastomosis location can be highly prone to  
408 developing new stenotic regions due to high variation in the WSS and must therefore be positioned as far  
409 as possible from the stenosis region. These findings justify a follow-up clinical study to determine whether  
410 a surgical anastomosis plan according to stenosis degree, location/s and target vessel/s complexity need to  
411 be conducted for every patient, as well as assess its feasibility. It can be derived from the results that  
412 sequential anastomosis might be good implementation if the angulation and sequential graft distance has  
413 been selected optimally. The bifurcation and end-to-side anastomosis regions are susceptible to highest  
414 pressure as expected. For the graft distance is more than 2 *cm* and the angulation of LIMA-RA anastomosis  
415 is equal or more than 90°, WSS reached its maximum value. Hence, this study suggests the more elongated  
416 distance between distal and proximal anastomosis [16, 43].

417 For RA angulation scenarios, improved WSS transition was observed in the RA anastomosis region  
418 for both cases; case\_90\_95 and case\_30\_95. Lower WSS compared to other RA angulation scenarios was  
419 observed for case\_30\_95 at the junction of RA and LIMA, which may affect WSS around stenosis regions,  
420 especially around the anastomosis sites. The perfusion indices indicated that the sequential grafting strategy  
421 improved the local coronary perfusion and would likely to lead to higher graft patency. *COP* of sequential  
422 grafting shows restored the coronary perfusions to the healthy level as well as for single grafting. These  
423 results can be easily implemented as a tool to compare different clinical scenarios by surgeons in the surgical  
424 planning stage and help them to make informed decisions beforehand. The graft patency rate is the most

425 important aspect especially for off-pump sequential grafting. Thus patient-specific sequential off-pump  
426 CABG grafting plan can be helpful for the best graft patency and good survey.

427         It is promising to have a clinical validation in CFD modeling. In the current study, the baseline  
428 model is validated with the ultrasound data and previous simulation results [17]. In addition, the transient  
429 time flow measurement of Kieser and Taggart [44] for CABG of LIMA with 2cm diameter to occluded  
430 LAD showed approximately 30 mL/min which is pretty much close to the current study LIMA flow rate  
431 (31.5 mL/min) with 95% stenosis level.

432

### 433 **Limitations and future work**

434 The current study is limited to one patient-specific model since competing specific surgical features are  
435 parametrized and their independent effects are investigated. While clinically relevant configurations were  
436 adopted in this study, additional CAD templates with different stenosis locations can also be investigated  
437 in the future. Our aim was to create a special cardiac surgery program for the patient-specific coronary  
438 artery revascularization planning by conventional coronary angiography, CT scan and flow dynamics  
439 applications. Preoperative evaluation of the bypass grafts flow patterns and flow hemodynamics may be  
440 important for the graft patency after CABG operations.

441         Physiological coronary artery flow is pulsatile, and this limitation should influence reported WSS  
442 levels. From numerical perspective, this modeling is relatively costly and the intended comparative  
443 objectives of this study can still be achieved through cardiac cycle averaged results [17, 30]. Furthermore,  
444 proposed clinical performance indices are based on mean flow measurements as it is complicated to impose  
445 synchronized catheter measurements that pose large clinical error levels. Steady state simulations are  
446 therefore promising as many researchers have been used and showed a good agreement with in vivo/vitro  
447 data [30, 45] and justified particularly for comparative purposes. In addition, current CFD simulation is  
448 based on a rigid model which does not account for the compliance of the arteries and the pulsatile rotation  
449 movement of the heart as well as induce deformations in the 3D geometries of coronary arteries. However,  
450 these are important factors, they would have a comparable effect on pre- and post-surgical configurations

451 and produce similar results to the comparative findings of this study. This is also justified due to uniform  
452 pressure fields observed in our simulations. Another limitation is related to the minor inaccuracies recorded  
453 during the scanning and segmentation process of geometry generation of the coronary arteries, however  
454 these inaccuracies doesn't affect validity of our parametric findings. Although flow parameters obtained  
455 from CFD simulation are useful to compare intra-patient configurations, non-dimensional parameters are  
456 also needed to facilitate the comparison of inter-patient configurations for future research.

457

458

## 459 **Conclusion**

460 Coronary artery disease is the major cause of mortality in the modern world. Present study attempted to  
461 extend our understanding of the patient-specific post-operative hemodynamics and myocardial perfusion in  
462 complex CABG scenarios. Obtaining and investigating big patient cohorts is challenging and require  
463 significant clinical effort. Current study illustrates the influence of anastomosis angle in end-to-side  
464 anastomosed grafts and the effect of distance between two anastomosis sites on a full-arterial  
465 revascularization geometry. In addition, non-Newtonian OpenFOAM solver as an open source CFD  
466 software was used to verify with the patient-specific ultrasound flow rate measurements and examine the  
467 performance optimization of the CABG virtual scenarios. From two different sets of computational  
468 analysis, several clinically relevant insights were obtained. First, the degree of stenosis is a crucial factor in  
469 determining the performance of coronary bypass surgeries in terms of coronary perfusion and WSS.  
470 Second, the sequential anastomosis can be done safely if the angulation and sequential graft distance are  
471 optimal. Third, the novel perfusion indices enable us to quantify the surgery performance by comparing the  
472 coronary artery perfusion of the surgical model with the clinical healthy physiological values. These indices  
473 can easily be implemented as a tool to compare different clinical scenarios by surgeons in the surgical  
474 planning stage, pending clinical trials. We believe that all of these novel findings help to ensure that this  
475 research study makes a valuable contribution to the existing CAD and CABG literature.

476

477

478

## 479 **Acknowledgements**

480 Funding is provided by grants from the European Research Council (ERC) Proof of Concept Grant

481 *KidsSurgicalPlan* and the TUBITAK 1003 priority-research program grant 115E690.

482

483

## 484 **Abbreviations**

|             |                                    |
|-------------|------------------------------------|
| <b>CABG</b> | Coronary artery bypass grafting    |
| <b>CAD</b>  | Coronary artery diseases           |
| <b>CEP</b>  | Cerebral perfusion index           |
| <b>CFD</b>  | Computational fluid dynamics       |
| <b>COP</b>  | Coronary perfusion index           |
| <b>CT</b>   | Computed tomography                |
| <b>IA</b>   | Innominate artery                  |
| <b>IH</b>   | Intimal hyperplasia                |
| <b>LAD</b>  | Left anterior descending           |
| <b>LCCA</b> | Left common carotid artery         |
| <b>LCX</b>  | Left circumflex artery             |
| <b>LIMA</b> | Left internal mammary artery       |
| <b>LOP</b>  | Lower Body Perfusion Index         |
| <b>LSA</b>  | Left subclavian artery             |
| <b>OM</b>   | Obtuse marginal                    |
| <b>m2</b>   | Second marginal artery             |
| <b>PCI</b>  | Percutaneous coronary intervention |
| <b>RA</b>   | Radial artery                      |
| <b>RCA</b>  | Right coronary artery              |
| <b>RM</b>   | Ramus marginalis                   |
| <b>s1</b>   | First septal artery                |
| <b>sec</b>  | Section                            |
| <b>VA</b>   | Vertebral artery                   |
| <b>WSS</b>  | Wall shear stress                  |

485

486

## 487 **References**

- 488 1. Rosamond W, Flegal K, Furie K, Go A, Greenlund K, Haase N, et al. Heart disease and stroke statistics-  
489 -2008 update: a report from the American Heart Association Statistics Committee and Stroke Statistics  
490 Subcommittee. *Circulation*. 2008;117(4):e25-146. Epub 2007/12/19. doi:  
491 10.1161/circulationaha.107.187998. PubMed PMID: 18086926.
- 492 2. Gaziano TA, Bitton A, Anand S, Abrahams-Gessel S, Murphy A. Growing epidemic of coronary heart  
493 disease in low- and middle-income countries. *Current problems in cardiology*. 2010;35(2):72-115. Epub  
494 2010/01/30. doi: 10.1016/j.cpcardiol.2009.10.002. PubMed PMID: 20109979; PubMed Central PMCID:  
495 PMCPMC2864143.
- 496 3. Okrainec K, Banerjee DK, Eisenberg MJ. Coronary artery disease in the developing world. *American*  
497 *Heart Journal*. 2004;148(1):7-15. doi: <https://doi.org/10.1016/j.ahj.2003.11.027>.
- 498 4. Mohr FW, Morice MC, Kappetein AP, Feldman TE, Stahle E, Colombo A, et al. Coronary artery bypass  
499 graft surgery versus percutaneous coronary intervention in patients with three-vessel disease and left  
500 main coronary disease: 5-year follow-up of the randomised, clinical SYNTAX trial. *Lancet (London,*  
501 *England)*. 2013;381(9867):629-38. Epub 2013/02/27. doi: 10.1016/s0140-6736(13)60141-5. PubMed  
502 PMID: 23439102.
- 503 5. Gatti G, Dell'Angela L, Benussi B, Dreas L, Forti G, Gabrielli M, et al. Bilateral internal thoracic artery  
504 grafting in octogenarians: where are the benefits? *Heart and Vessels*. 2016;31(5):702-12. doi:  
505 10.1007/s00380-015-0675-z.
- 506 6. Bisleri G, Di Bacco L, Giroletti L, Muneretto C. Total arterial grafting is associated with improved clinical  
507 outcomes compared to conventional myocardial revascularization at 10 years follow-up. *Heart and*  
508 *Vessels*. 2017;32(2):109-16. doi: 10.1007/s00380-016-0846-6.
- 509 7. Ahn J-M, Park D-W, Lee CW, Chang M, Cavalcante R, Sotomi Y, et al. Comparison of Stenting Versus  
510 Bypass Surgery According to the Completeness of Revascularization in Severe Coronary Artery Disease.  
511 Patient-Level Pooled Analysis of the SYNTAX, PRECOMBAT, and BEST Trials. 2017;10(14):1415-24. doi:  
512 10.1016/j.jcin.2017.04.037.
- 513 8. Taggart DP. Current status of arterial grafts for coronary artery bypass grafting. *Annals of*  
514 *Cardiothoracic Surgery*. 2013;2(4):427-30. doi: 10.3978/j.issn.2225-319X.2013.07.21. PubMed PMID:  
515 PMC3741887.
- 516 9. Al-Sabti HA, Al Kindi A, Al-Rasadi K, Banerjee Y, Al-Hashmi K, Al-Hinai A. Saphenous vein graft vs. radial  
517 artery graft searching for the best second coronary artery bypass graft. *Journal of the Saudi Heart*  
518 *Association*. 2013;25(4):247-54. doi: 10.1016/j.jsha.2013.06.001. PubMed PMID: PMC3818632.
- 519 10. Tsukui H, Shinke M, Park YK, Yamazaki K. Longer coronary anastomosis provides lower energy loss in  
520 coronary artery bypass grafting. *Heart Vessels*. 2017;32(1):83-9. Epub 2016/08/04. doi: 10.1007/s00380-  
521 016-0880-4. PubMed PMID: 27484320.
- 522 11. Nazemi M, Kleinstreuer C, Archie JP. Pulsatile two-dimensional flow and plaque formation in a carotid  
523 artery bifurcation. *Journal of Biomechanics*. 1990;23(10):1031-7. doi: [https://doi.org/10.1016/0021-](https://doi.org/10.1016/0021-9290(90)90318-W)  
524 [9290\(90\)90318-W](https://doi.org/10.1016/0021-9290(90)90318-W).
- 525 12. Wang W, Mao B, Wang H, Geng X, Zhao X, Zhang H, et al. Hemodynamic analysis of sequential graft  
526 from right coronary system to left coronary system. *BioMedical Engineering OnLine*. 2016;15(2):132. doi:  
527 10.1186/s12938-016-0259-x.
- 528 13. Puskas JD, Lazar HL, Mack MJ, Sabik JF, III, Paul Taggart D. State-of-the-Art Coronary Artery Bypass  
529 Graft. *Seminars in Thoracic and Cardiovascular Surgery*. 2014;26(1):76-94. doi:  
530 10.1053/j.semthor.2014.03.002.
- 531 14. Flemma RJ, Johnson WD, Lepley D, Jr. Triple aorto-coronary vein bypass as treatment for coronary  
532 insufficiency. *Archives of surgery (Chicago, Ill : 1960)*. 1971;103(1):82-3. Epub 1971/07/01. PubMed PMID:  
533 5088438.
- 534 15. Hajati O, Zarrabi K, Karimi R, Hajati A. CFD simulation of hemodynamics in sequential and individual  
535 coronary bypass grafts based on multislice CT scan datasets. *Conference proceedings : Annual*

- 536 International Conference of the IEEE Engineering in Medicine and Biology Society IEEE Engineering in  
537 Medicine and Biology Society Annual Conference. 2012;2012:641-4. Epub 2013/02/01. doi:  
538 10.1109/embc.2012.6346013. PubMed PMID: 23365974.
- 539 16. Kabinejadian F, Chua LP, Ghista DN, Sankaranarayanan M, Tan YS. A novel coronary artery bypass graft  
540 design of sequential anastomoses. *Ann Biomed Eng.* 2010;38(10):3135-50. Epub 2010/05/25. doi:  
541 10.1007/s10439-010-0068-5. PubMed PMID: 20496004.
- 542 17. Dur O, Coskun ST, Coskun KO, Frakes D, Kara LB, Pekkan K. Computer-Aided Patient-Specific Coronary  
543 Artery Graft Design Improvements Using CFD Coupled Shape Optimizer. *Cardiovascular engineering and  
544 technology.* 2011;2(1):35-47. Epub 2012/03/27. doi: 10.1007/s13239-010-0029-z. PubMed PMID:  
545 22448203; PubMed Central PMCID: PMC3291828.
- 546 18. Moore J, Steinman D, Prakash S, Johnston K, Ethier C. A numerical study of blood flow patterns in  
547 anatomically realistic and simplified end-to-side anastomoses. *Journal of biomechanical engineering.*  
548 1999;121(3):265-72.
- 549 19. Sankaran S, Moghadam ME, Kahn AM, Tseng EE, Guccione JM, Marsden AL. Patient-specific multiscale  
550 modeling of blood flow for coronary artery bypass graft surgery. *Annals of biomedical engineering.*  
551 2012;40(10):2228-42.
- 552 20. Mueller XM, Chassot P-G, Zhou J, Eisa KM, Chappuis C, Tevaearai HT, et al. Hemodynamics  
553 optimization during off-pump coronary artery bypass: the 'no compression' technique. *European Journal  
554 of Cardio-Thoracic Surgery.* 2002;22(2):249-54. doi: 10.1016/s1010-7940(02)00270-1.
- 555 21. Sankaranarayanan M, Ghista DN, Poh CL, Seng TY, Kassab GS. Analysis of blood flow in an out-of-plane  
556 CABG model. *American journal of physiology Heart and circulatory physiology.* 2006;291(1):H283-95.  
557 Epub 2006/02/21. doi: 10.1152/ajpheart.01347.2005. PubMed PMID: 16489100.
- 558 22. Ballarin F, Faggiano E, Manzoni A, Quarteroni A, Rozza G, Ippolito S, et al. Numerical modeling of  
559 hemodynamics scenarios of patient-specific coronary artery bypass grafts. *Biomechanics and modeling in  
560 mechanobiology.* 2017;16(4):1373-99.
- 561 23. Keslerová R, Řezníček H, Padělek T. Numerical modelling of generalized Newtonian fluids in bypass  
562 tube. *Advances in Computational Mathematics.* 2019;45(4):2047-63.
- 563 24. Keynton RS, Evancho MM, Sims RL, Rodway NV, Gobin A, Rittgers SE. Intimal hyperplasia and wall  
564 shear in arterial bypass graft distal anastomoses: an in vivo model study. *J Biomech Eng.* 2001;123(5):464-  
565 73. Epub 2001/10/17. doi: 10.1115/1.1389461. PubMed PMID: 11601732.
- 566 25. Drouin A, Noiseux N, Chartrand-Lefebvre C, Soulez G, Mansour S, Tremblay JA, et al. Composite versus  
567 conventional coronary artery bypass grafting strategy for the anterolateral territory: study protocol for a  
568 randomized controlled trial. *Trials.* 2013;14:270. Epub 2013/08/27. doi: 10.1186/1745-6215-14-270.  
569 PubMed PMID: 23971858; PubMed Central PMCID: PMC3766263.
- 570 26. Kurtoglu M, Ates S, Demirozu T, Duvan I, Karagoz HY, Aybek T. Facile stabilization and exposure  
571 techniques in off-pump coronary bypass surgery. *The Annals of thoracic surgery.* 2008;85(5):e30-1. Epub  
572 2008/04/30. doi: 10.1016/j.athoracsur.2008.02.025. PubMed PMID: 18442527.
- 573 27. Otsuka F, Yahagi K, Sakakura K, Virmani R. Why is the mammary artery so special and what protects it  
574 from atherosclerosis? *Annals of Cardiothoracic Surgery.* 2013;2(4):519-26.
- 575 28. Martínez-González B, Reyes-Hernández CG, Quiroga-Garza A, Rodríguez-Rodríguez VE, Esparza-  
576 Hernández CN, Elizondo-Omaña RE, et al. Conduits Used in Coronary Artery Bypass Grafting: A Review of  
577 Morphological Studies. *Annals of Thoracic and Cardiovascular Surgery.* 2017;23(2):55-65. doi:  
578 10.5761/atcs.ra.16-00178. PubMed PMID: 28202895; PubMed Central PMCID: PMC35422630.
- 579 29. <https://www.openfoam.com/>.
- 580 30. Piskin S, Unal G, Arnaz A, Sarioglu T, Pekkan K. Tetralogy of Fallot Surgical Repair: Shunt  
581 Configurations, Ductus Arteriosus and the Circle of Willis. *Cardiovascular engineering and technology.*  
582 2017;8(2):107-19. Epub 2017/04/07. doi: 10.1007/s13239-017-0302-5. PubMed PMID: 28382440;  
583 PubMed Central PMCID: PMC35446850.

- 584 31. Piskin S, Undar A, Pekkan K. Computational Modeling of Neonatal Cardiopulmonary Bypass  
585 Hemodynamics With Full Circle of Willis Anatomy. *Artificial organs*. 2015;39(10):E164-75. Epub  
586 2015/05/06. doi: 10.1111/aor.12468. PubMed PMID: 25940836.
- 587 32. Chen J, Lu XY, Wang W. Non-Newtonian effects of blood flow on hemodynamics in distal vascular graft  
588 anastomoses. *J Biomech*. 2006;39(11):1983-95. Epub 2005/08/02. doi: 10.1016/j.jbiomech.2005.06.012.  
589 PubMed PMID: 16055134.
- 590 33. Rodrigue D. The Generalized Power-Law: A New Viscosity Model. *AIP Conference Proceedings*.  
591 2008;1027(1):1441-3. doi: 10.1063/1.2964603.
- 592 34. Hariharan P, Giarra M, Reddy V, Day SW, Manning KB, Deutsch S, et al. Multilaboratory particle image  
593 velocimetry analysis of the FDA benchmark nozzle model to support validation of computational fluid  
594 dynamics simulations. *Journal of biomechanical engineering*. 2011;133(4):041002.
- 595 35. Stevens SL, Wood S, Koshiaris C, Law K, Glasziou P, Stevens RJ, et al. Blood pressure variability and  
596 cardiovascular disease: systematic review and meta-analysis. *BMJ*. 2016;354:i4098. doi:  
597 10.1136/bmj.i4098.
- 598 36. Samady H, Eshtehardi P, McDaniel MC, Suo J, Dhawan SS, Maynard C, et al. Coronary artery wall shear  
599 stress is associated with progression and transformation of atherosclerotic plaque and arterial remodeling  
600 in patients with coronary artery disease. *Circulation*. 2011;124(7):779-88.
- 601 37. Jackson ZS, Ishibashi H, Gotlieb AI, Langille BL. Effects of anastomotic angle on vascular tissue  
602 responses at end-to-side arterial grafts. *Journal of vascular surgery*. 2001;34(2):300-7.
- 603 38. Brien TO, Walsh M, McGloughlin T. On reducing abnormal hemodynamics in the femoral end-to-side  
604 anastomosis: the influence of mechanical factors. *Annals of Biomedical Engineering*. 2005;33(3):310-22.
- 605 39. Qiao A, Liu Y. Influence of graft–host diameter ratio on the hemodynamics of CABG. *Bio-Medical  
606 Materials and Engineering*. 2006;16(3):189-201.
- 607 40. Nordgaard H, Nordhaug D, Kirkeby-Garstad I, Løvstakken L, Vitale N, Haaverstad R. Different graft flow  
608 patterns due to competitive flow or stenosis in the coronary anastomosis assessed by transit-time  
609 flowmetry in a porcine model. *European journal of cardio-thoracic surgery*. 2009;36(1):137-42.
- 610 41. Su C, Lee D, Tran-Son-Tay R, Shyy W. Fluid flow structure in arterial bypass anastomosis. 2005.
- 611 42. Longest PW, Kleinstreuer C, Deanda A. Numerical simulation of wall shear stress and particle-based  
612 hemodynamic parameters in pre-cuffed and streamlined end-to-side anastomoses. *Annals of biomedical  
613 engineering*. 2005;33(12):1752-66.
- 614 43. Totorean A, Bernad S, Hudrea I, Susan-Resiga R, editors. Competitive flow and anastomosis angle  
615 influence on bypass hemodynamics in unsteady flow conditions. *AIP Conference Proceedings*; 2017: AIP  
616 Publishing LLC.
- 617 44. Kieser TM, Taggart DP. The use of intraoperative graft assessment in guiding graft revision. *Annals of  
618 cardiothoracic surgery*. 2018;7(5):652.
- 619 45. Shintani Y, Iino K, Yamamoto Y, Kato H, Takemura H, Kiwata T. Analysis of computational fluid  
620 dynamics and particle image velocimetry models of distal-end side-to-side and end-to-side anastomoses  
621 for coronary artery bypass grafting in a pulsatile flow. *Circulation Journal*. 2017;82(1):110-7.

622

623

624

625

626

## 627 **List of Table captions**

628 **Table 1.** Coronary artery flow within the first level branches of the coronary tree for healthy case.

629 **Table 2.** Volumetric flow rates on different cross-sectional locations for different bypass distances and  
630 degrees of stenosis are calculated on the selected cross-sectional locations labeled in Figure 2(a).

631 **Table 3.** Volumetric flow rates on different cross-sectional locations for different radial artery (RA)  
632 anastomosis angulation and degrees of stenosis are calculated on the selected cross-sectional locations  
633 labeled in Figure 2(b).

634 **Table 4.** Calculated COP (Coronary Perfusion Index), CEP (Cerebral Perfusion Index), and LOP (Lower  
635 Body Perfusion Index) for all 12 configurations simulated.

636

## 637 **List of Figure captions**

638 **Figure 1.** Three-dimensional reconstructed integrated aorta-coronary artery model of a 54-year-old patient  
639 is displayed together with boundary condition extensions and peripheral lumped resistance network.  
640 Coronary and systemic circulation circuits were closed with the left ventricle and right atrial pressure in the  
641 diastole. The aorta-coronary anatomy is comprised of, Ascending Aorta (AAo) right coronary artery (RCA),  
642 left circumflex artery (LCX), left anterior descending artery (LAD), obtuse marginal (OM), second  
643 marginal artery (m2), first septal artery (s1), diagonal artery (diag), ramus marginalis (rm), left internal  
644 mammary artery (LIMA), descending aorta (DAo), Innominate artery (Inn. A), left common carotid artery  
645 (LCCA), vertebral artery (VA), left subclavian artery (LSA). Grafts are shown in colors, RA is in cyan and  
646 LIMA is in pink color. Stenosis locations are marked with red colored arrows.

647 **Figure 2.** Close-up view of the stenosis sites on the patient-specific 3D reconstructed aorta-coronary artery  
648 model; (a) for two by-pass distances and two degrees of stenosis where LIMA is sequentially anastomosed  
649 to LAD having two stenosis sites. (b) Close-up view of patient-specific 3D aorta-coronary for RA  
650 angulation and different degrees of stenosis where RA is anastomosed to left LIMA and sequentially  
651 anastomosed to LAD, OM and OM2 with three stenosis sites. Different arbitrary planes were selected to  
652 measure the flow rate where labeled with alphabetical letter codes and a number in order of appearance,  
653 letter “P” indicates pre-stenosis cross section in the coronary artery and letter “B” corresponds to flow rate  
654 passing through bypass cross sections.

655 **Figure 3.** Summary of computational mesh and its verification campaign. (a) A cross-sectional plane is  
656 generated in pink color and along vessel skeleton center line the velocity magnitude is calculated for 7  
657 different mesh densities (1,1.4, 1.8, 2.2, 2.7, 3.5 and 4M) (b) Surface mesh for selected baseline model with  
658 2.2 M elements and (c) the calculated velocity magnitude was plotted along the mean vessel skeleton line  
659 for each different mesh densities.

660 **Figure 4.** Comparison of pressure distribution for different bypass distance scenarios. Figures are labeled  
661 with their generic case names for the degree of stenosis and distance between two stenosis sites Generic  
662 case names (e.g. case\_a\_b\_c) for bypass distance scenarios were defined, where “a” represents the bypass  
663 distance,” b” stenosis 1 and “c” stenosis 2. For brevity just for the case\_2\_75\_75, the degree of stenosis  
664 for both sites, LIMA and LAD were labeled on the figure.



665 **Figure 5.** Comparison of pressure distribution for different RA angulation scenarios. Figures are labeled  
666 with generic case names for RA angulation and the degree of stenosis. Generic case names (e.g. case\_d\_e)  
667 for RA angulation scenarios were defined where “d” represents the RA angulation and “e” the degree of  
668 stenosis. For brevity just for the case\_30\_75, the degree of stenosis, the RA to LIMA anastomosis angle,  
669 LAD, OM and m2 are labeled on the figure.

670 **Figure 6.** Variation of wall shear stress (WSS) distribution contour for different bypass distance scenarios.  
671 Generic case names (e.g. case\_a\_b\_c) for bypass distance scenarios were defined where “a” represents the  
672 bypass distance, “b” stenosis 1 and “c” stenosis 2. For brevity just for the case\_2\_75\_75, the degree of  
673 stenosis for both sites, LIMA and LAD were labeled on the figure.

674 **Figure 7.** Comparison of wall shear stress (WSS) distribution contour for different RA angulation  
675 scenarios. Generic case names (e.g. case\_d\_e) for RA angulation scenarios were defined where “d”  
676 represents the RA angulation and “e” the degree of stenosis. For brevity just for the case\_30\_75, the degree  
677 of stenosis, the RA to LIMA anastomosis angle, LAD, OM and m2 are labeled on the figure.

678 **Figure 8.** Streamlines colored with velocity magnitude for LIMA graft to LAD with two stenoses and  
679 different stenosis locations. For brevity just for the case\_2\_75\_75, the degree of stenosis for both sites,  
680 LIMA and LAD were labeled on the figure.

681

## 682 **List of Tables**

683 Table 1. Coronary artery flow within the first level branches of coronary tree for healthy case

| <b>Coronary artery branches</b> | <b>Flow rate(<i>mL/min</i>)</b> |
|---------------------------------|---------------------------------|
| Inno. A                         | 555                             |
| LCCA                            | 123.5                           |
| VA                              | 62                              |
| LSA                             | 93.5                            |
| S1                              | 13                              |
| LAD_main                        | 32.5                            |
| Diagonal                        | 20                              |
| RM                              | 27                              |
| LCX_main                        | 36                              |
| OM                              | 32                              |
| M1                              | 20                              |
| RCA                             | 77                              |
| Dao                             | 3958                            |

684

685

686

687

688 Table 2. Volumetric flow rates on different cross-sectional locations for different bypass distances and  
 689 degrees of stenosis are calculated on selected cross-sectional locations labeled in Figure 2(a).

|                     | Volumetric Flow Rate ( <i>mL/min</i> ) |           |           |           |            |
|---------------------|----------------------------------------|-----------|-----------|-----------|------------|
|                     | <b>B (LIMA)</b>                        | <b>P1</b> | <b>B2</b> | <b>P2</b> | <b>LAD</b> |
| <b>case_2_75_75</b> | 24                                     | 8.5       | 14.5      | 18        | 32.5       |
| <b>case_4_75_75</b> | 24                                     | 8.5       | 12        | 20.5      | 32.5       |
| <b>case_2_75_95</b> | 31                                     | 1.5       | 23        | 9.5       | 32.5       |
| <b>case_4_75_95</b> | 31                                     | 1.5       | 22        | 10.5      | 32.5       |
| <b>case_2_95_75</b> | 31                                     | 1.5       | 14.5      | 18        | 32.5       |
| <b>case_4_95_75</b> | 31                                     | 1.5       | 13.5      | 19        | 32.5       |
| <b>case_2_95_95</b> | 31                                     | 1.5       | 26.5      | 6         | 32.5       |
| <b>case_4_95_95</b> | 31                                     | 1.5       | 22        | 10.5      | 32.5       |
| <b>Healthy</b>      | -                                      |           | -         | 31        | 32.5       |

690

691

692

693

694

695 Table 3. Volumetric flow rates calculated on cross-sectional locations for different radial artery (RA)  
 696 anastomosis angle and the degree of stenosis are calculated on selected cross-sectional locations labeled  
 697 in Figure 2(b).

|                   | Volumetric Flow Rate ( <i>mL/min</i> ) |           |           |            |           |           |           |           |           |           |
|-------------------|----------------------------------------|-----------|-----------|------------|-----------|-----------|-----------|-----------|-----------|-----------|
|                   | <b>B (LIMA)</b>                        | <b>B1</b> | <b>P1</b> | <b>LAD</b> | <b>B2</b> | <b>P2</b> | <b>OM</b> | <b>B3</b> | <b>P3</b> | <b>M2</b> |
| <b>case_30_75</b> | 40.5                                   | 24.5      | 8         | 32.5       | 16        | 18        | 26        | 8         | 8         | 16        |
| <b>case_90_75</b> | 39.5                                   | 24.5      | 8         | 32.5       | 15        | 18        | 25        | 7         | 8         | 15        |
| <b>case_30_95</b> | 67                                     | 30        | 2.5       | 32.5       | 37        | 7         | 31        | 13        | 5         | 18        |
| <b>case_90_95</b> | 64                                     | 31        | 1.5       | 32.5       | 33        | 7         | 29.5      | 10.5      | 5.5       | 16        |
| <b>Healthy</b>    | -                                      | -         | 32.5      | 32.5       | -         | 33        | 33        | -         | 20        | 20        |

698

699

700

701

702

703

704 Table 4. Calculated COP (Coronary Perfusion Index), CEP (Cerebral Perfusion Index), and LOP (Lower  
705 Body Perfusion Index) for all 12 configuration cases

|     | <b>COP</b>          | <b>CEP</b> | <b>LOP</b> |     |
|-----|---------------------|------------|------------|-----|
| 706 |                     |            |            |     |
| 707 | <b>case_2_75_75</b> | 0.4        | 0.6        | 0.1 |
| 708 | <b>case_2_75_95</b> | 0.4        | 0.5        | 0.1 |
| 709 | <b>case_2_95_75</b> | 0.4        | 0.5        | 0   |
| 710 | <b>case_2_95_95</b> | 0.4        | 0.5        | 0   |
| 711 | <b>case_4_75_75</b> | 0.4        | 0.5        | 0.1 |
| 712 | <b>case_4_75_95</b> | 0.5        | 0.5        | 0.1 |
| 713 | <b>case_4_95_75</b> | 0.4        | 0.5        | 0   |
| 714 | <b>case_4_95_95</b> | 0.5        | 0.5        | 0   |
| 715 | <b>case_30_75</b>   | 4          | 0.4        | 0.2 |
| 716 | <b>case_30_95</b>   | 3.5        | 0.5        | 0.2 |
| 717 | <b>case_90_75</b>   | 4.1        | 0.4        | 0.4 |
| 718 | <b>case_90_95</b>   | 3.3        | 0.5        | 0.1 |
|     | <b>single_G_75</b>  | 0.4        | 0.6        | 0.1 |
|     | <b>single_G_95</b>  | 0.4        | 0.5        | 0   |

719  
720  
721  
722  
723  
724  
725  
726  
727  
728

729 **List of Figures**

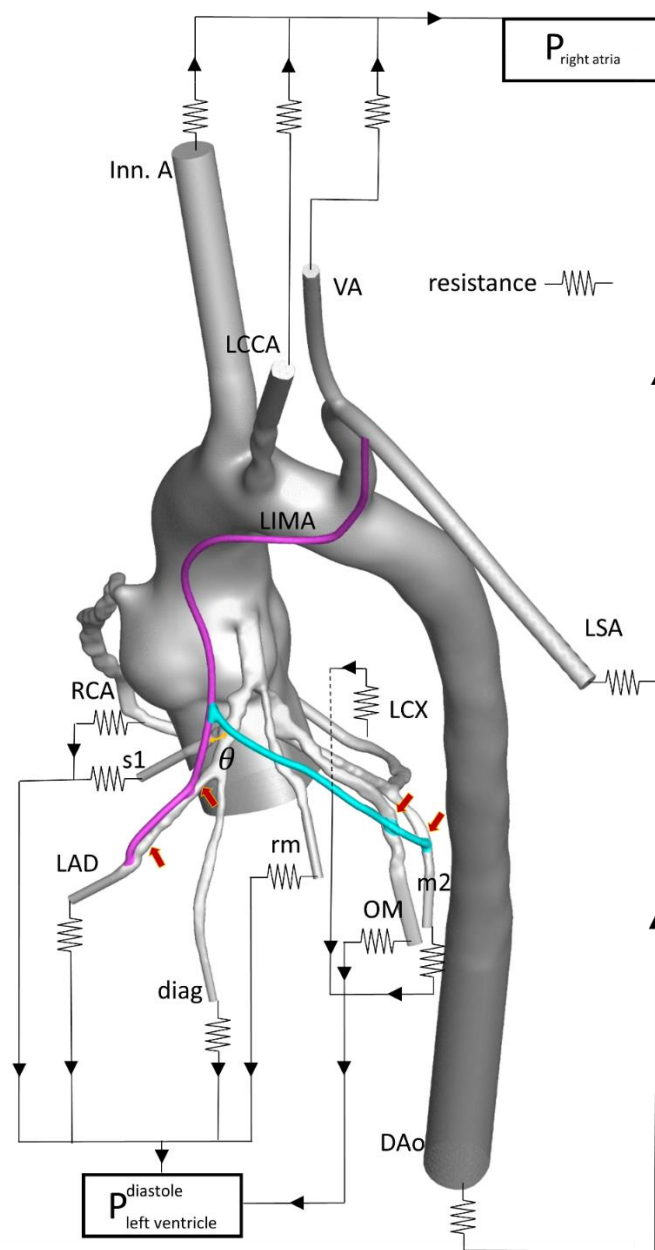

730

731 Figure 1. Three-dimensional reconstructed integrated aorta-coronary artery model of a 54-year-old patient  
732 is displayed together with boundary condition extensions and peripheral lumped resistance network.  
733 Coronary and systemic circulation circuits were closed with the left ventricle and right atrial pressure in the  
734 diastole. The aorta-coronary anatomy is comprised of, Ascending Aorta (AAo) right coronary artery (RCA),  
735 left circumflex artery (LCX), left anterior descending artery (LAD), obtuse marginal (OM), second  
736 marginal artery (m2), first septal artery (s1), diagonal artery (diag), ramus marginalis (rm), left internal  
737 mammary artery (LIMA), descending aorta (DAo), Innominate artery (Inn. A), left common carotid artery  
738 (LCCA), vertebral artery (VA), left subclavian artery (LSA). Grafts are shown in colors, RA is in cyan and  
739 LIMA is in pink color. Stenosis locations are marked with red colored arrows.

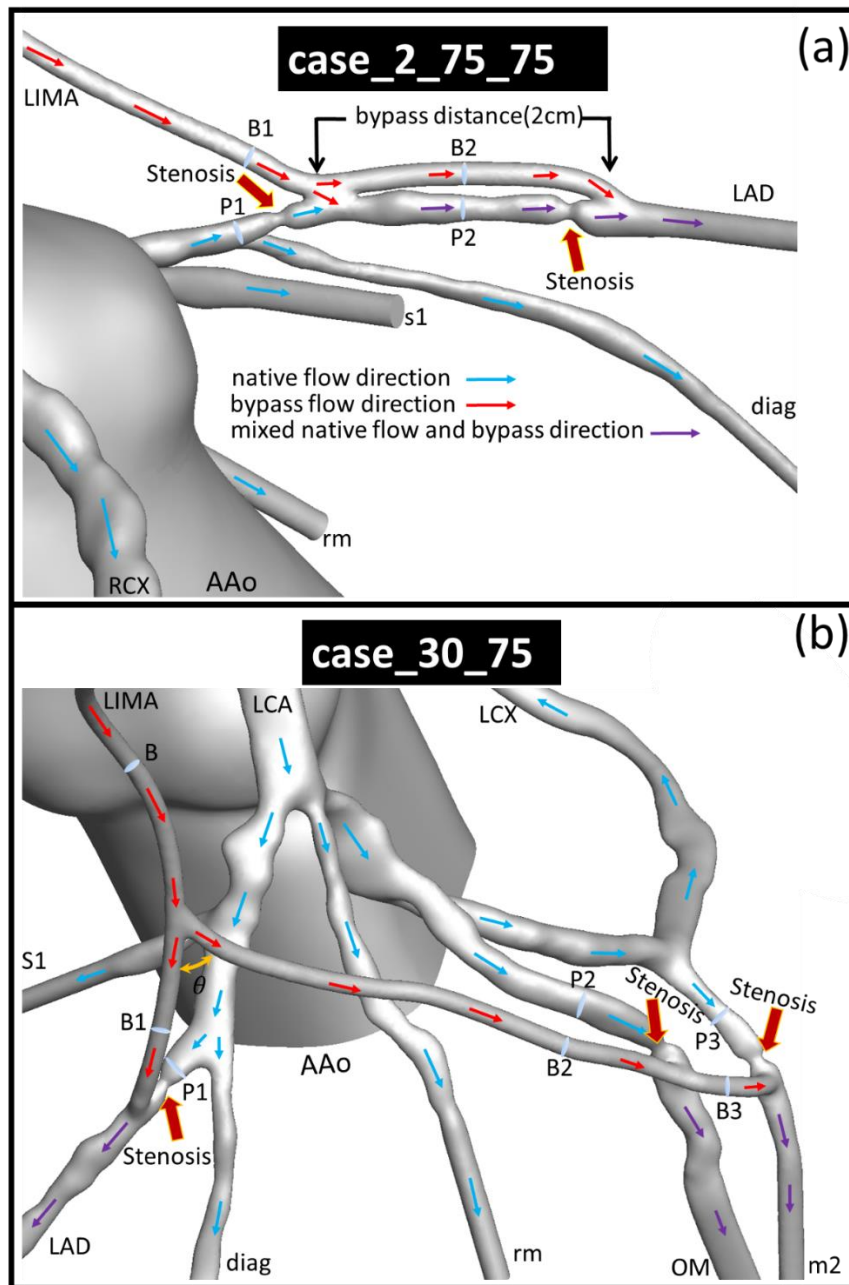

740

741 Figure 2. Close-up view of the stenosis sites on the patient-specific 3D reconstructed aorta-coronary artery  
742 model; (a) for two by-pass distances and two degrees of stenosis where LIMA is sequentially anastomosed  
743 to LAD having two stenosis sites. (b) Close-up view of patient-specific 3D aorta-coronary for RA  
744 angulation and different degrees of stenosis where RA is anastomosed to left LIMA and sequentially  
745 anastomosed to LAD, OM and OM2 with three stenosis sites. Different arbitrary planes were selected to  
746 measure the flow rate where labeled with alphabetical letter codes and a number in order of appearance,  
747 letter “P” indicates pre-stenosis cross section in the coronary artery and letter “B” corresponds to flow rate  
748 passing through bypass cross sections.

749

750

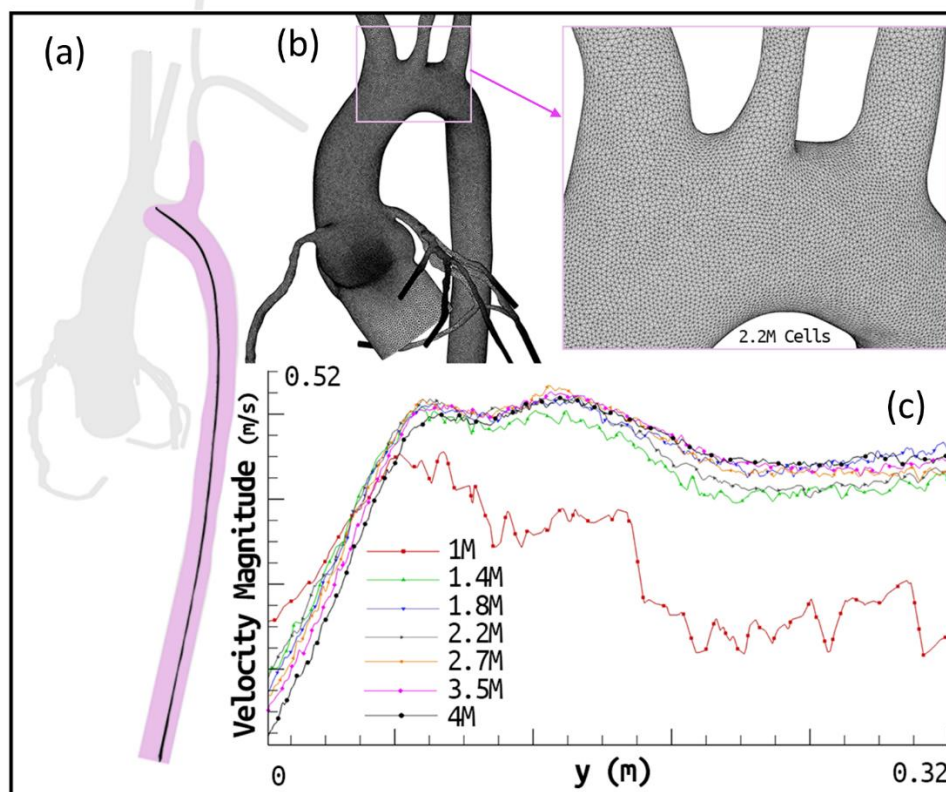

751

752 Figure 3. Summary of computational mesh and its verification campaign. (a) A cross-sectional plane is  
753 generated in pink color and along vessel skeleton center line the velocity magnitude is calculated for 7  
754 different mesh densities (1,1.4, 1.8, 2.2, 2.7, 3.5 and 4M) (b) Surface mesh for selected baseline model with  
755 2.2 M elements and (c) the calculated velocity magnitude was plotted along the mean vessel skeleton line  
756 for each different mesh densities.

757

758

759

760

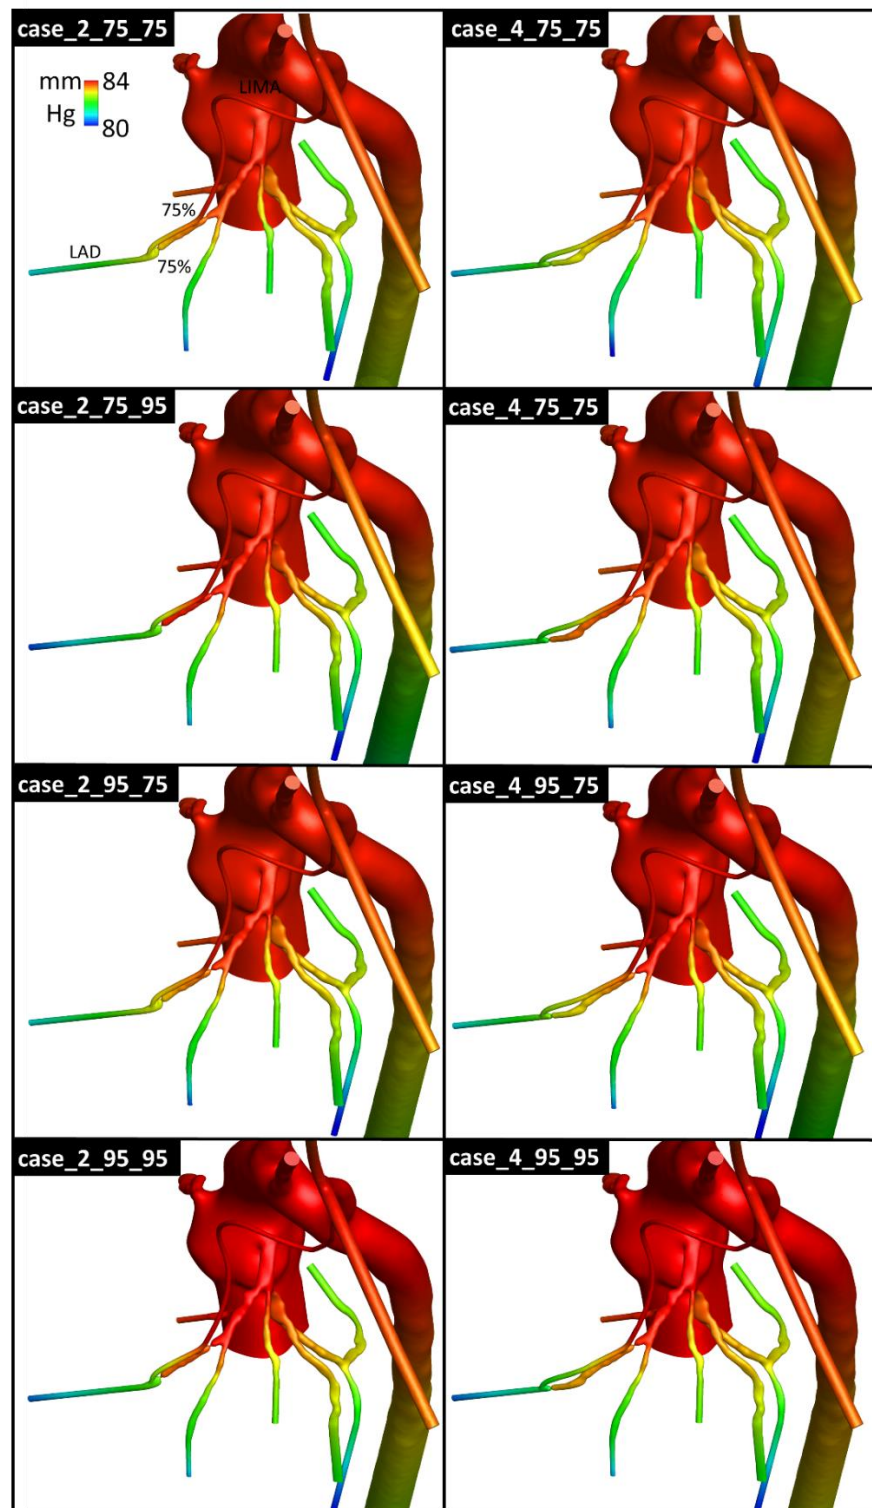

761

762 Figure 4. Comparison of pressure distribution for different bypass distance scenarios. Figures are labeled  
763 with their generic case names for the degree of stenosis and distance between two stenosis sites Generic  
764 case names (e.g. case\_a\_b\_c) for bypass distance scenarios were defined, where “a” represents the bypass  
765 distance,” b” stenosis 1 and “c” stenosis 2. For brevity just for the case\_2\_75\_75, the degree of stenosis  
766 for both sites, LIMA and LAD were labeled on the figure.

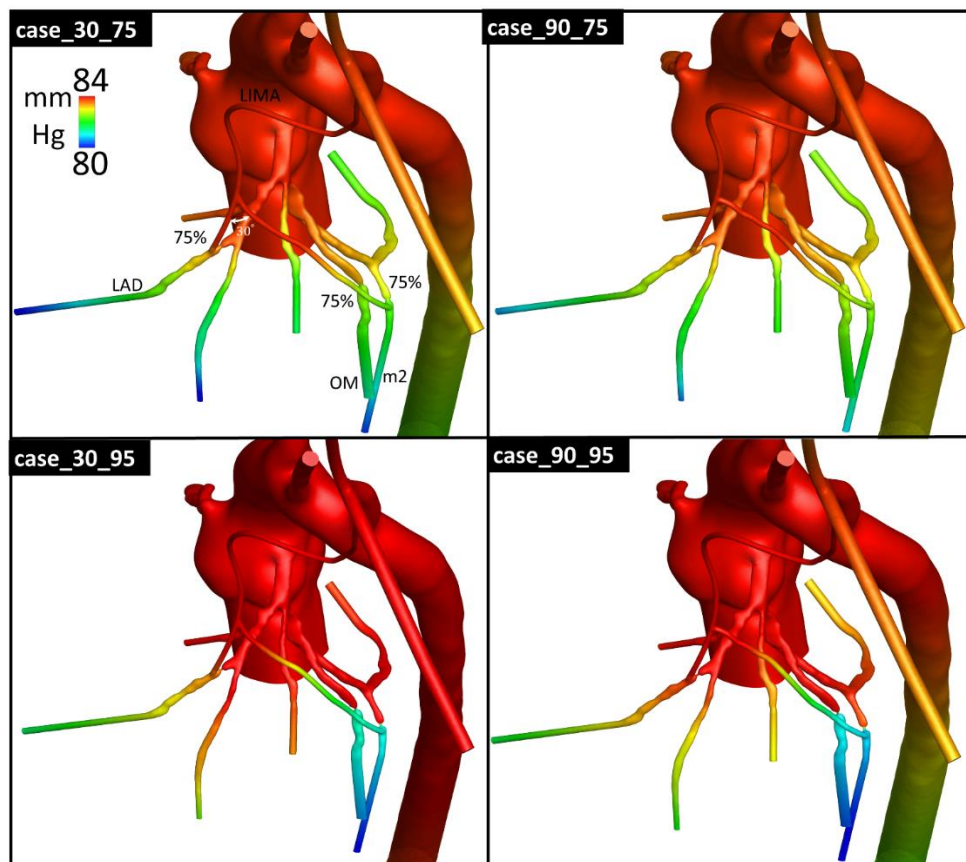

767

768 Figure 5. Comparison of pressure distribution for different RA angulation scenarios. Figures are labeled  
769 with generic case names for RA angulation and the degree of stenosis. Generic case names (e.g. case\_d\_e)  
770 for RA angulation scenarios were defined where “d” represents the RA angulation and “e” the degree of  
771 stenosis. For brevity just for the case\_30\_75, the degree of stenosis, the RA to LIMA anastomosis angle,  
772 LAD, OM and m2 are labeled on the figure.

773

774

775

776

777

778



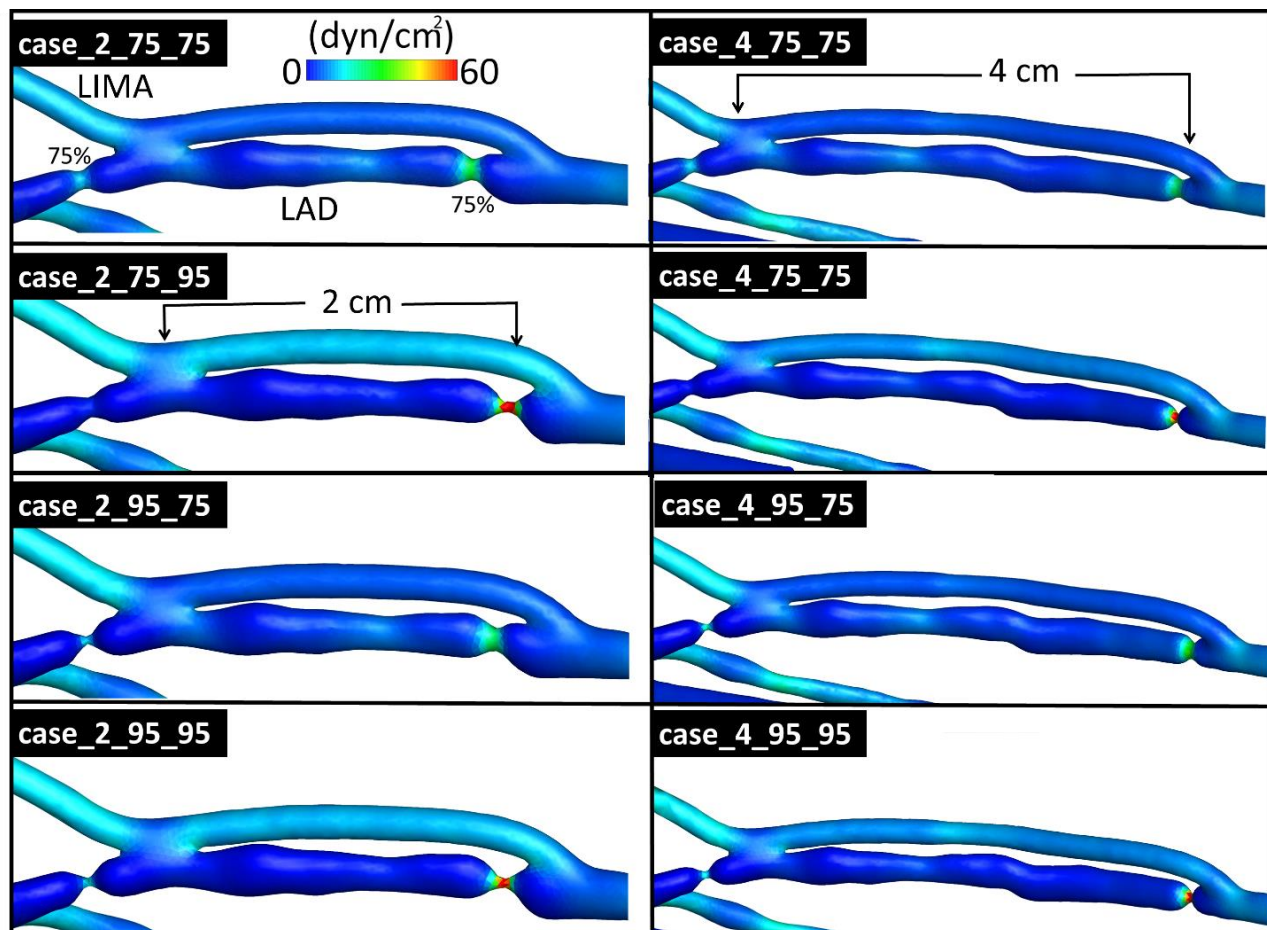

779

780 Figure 6. Variation of wall shear stress (WSS) distribution contour for different bypass distance scenarios.  
781 Generic case names (e.g. case\_a\_b\_c) for bypass distance scenarios were defined where “a” represents the  
782 bypass distance, “b” stenosis 1 and “c” stenosis 2. For brevity just for the case\_2\_75\_75, the degree of  
783 stenosis for both sites, LIMA and LAD were labeled on the figure.

784

785

786

787

788

789

790

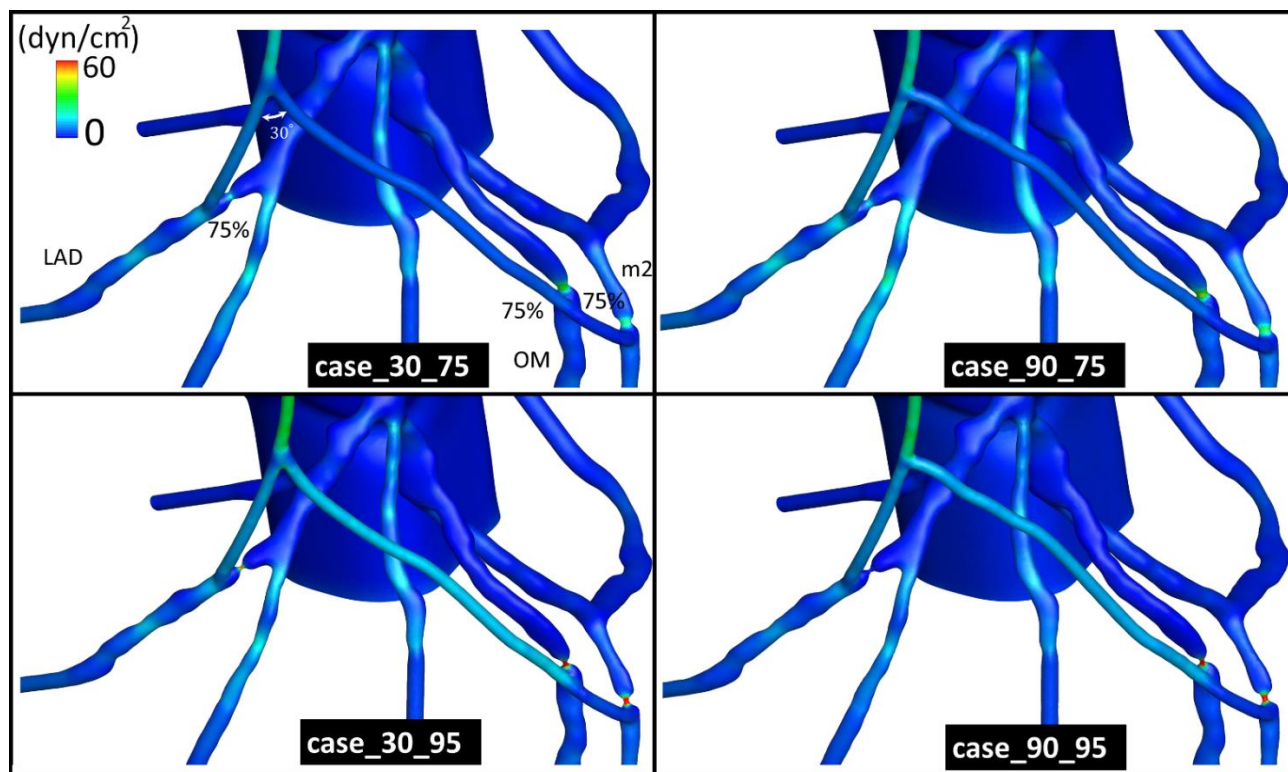

791

792 Figure 7. Comparison of wall shear stress (WSS) distribution contour for different RA angulation scenarios.  
793 Generic case names (e.g. case\_d\_e) for RA angulation scenarios were defined where “d” represents the RA  
794 angulation and “e” the degree of stenosis. For brevity just for the case\_30\_75, the degree of stenosis, the  
795 RA to LIMA anastomosis angle, LAD, OM and m2 are labeled on the figure.

796

797

798

799

800

801

802

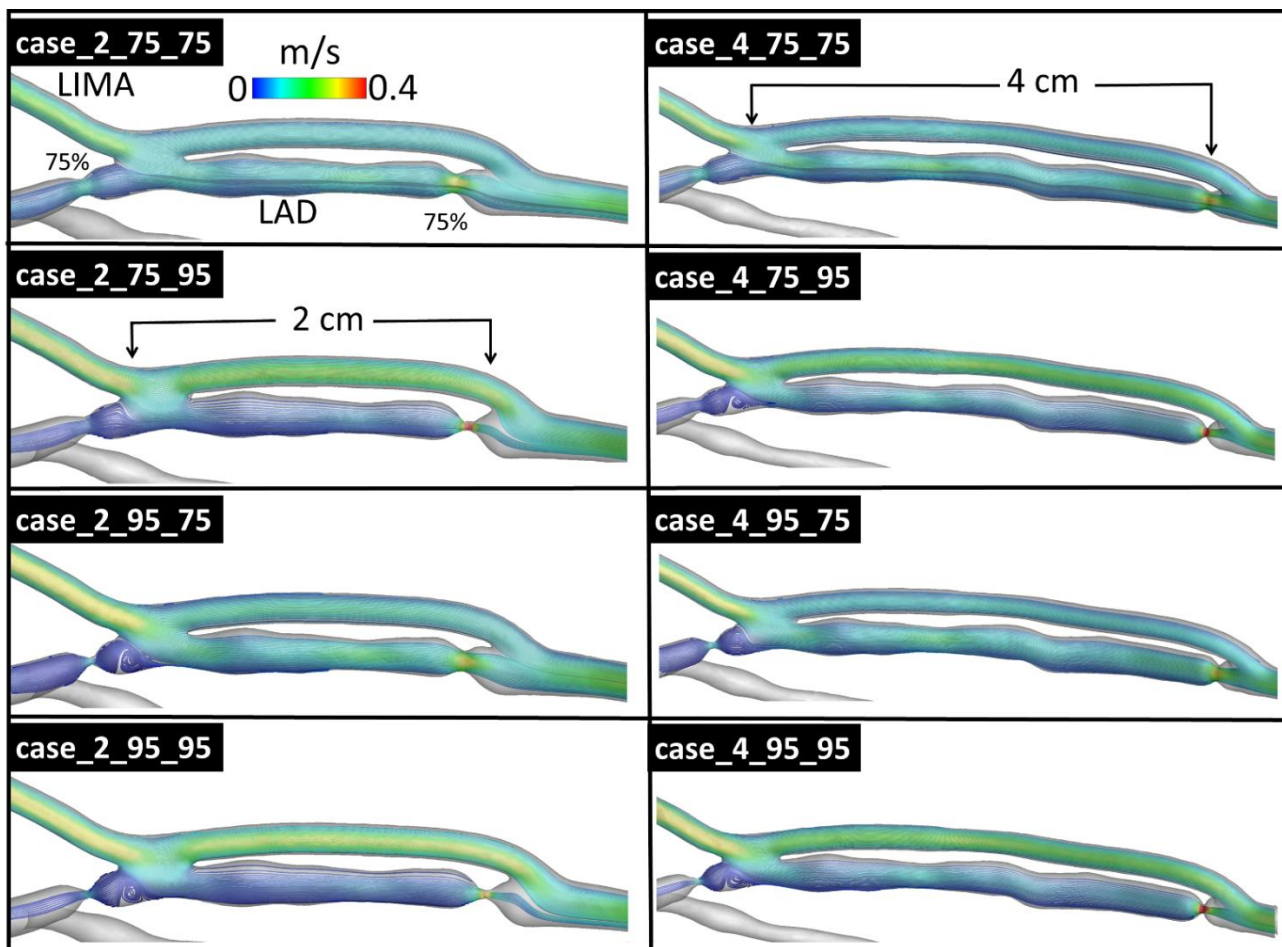

803

804 Figure 8. Streamlines colored with velocity magnitude for LIMA graft to LAD with two stenoses and  
805 different stenosis locations. For brevity just for the case\_2\_75\_75, the degree of stenosis for both sites,  
806 LIMA and LAD were labeled on the figure.
